# Supplementary material
Source: PubMed Central journal article supplement (PMC1964865)
Supplement: pnas_0702251104_3.pdf [file pnas_0702251104_3.pdf]

A

PKN-1 32-QKLDFSDTMVQQKLD**DIKD**RIKREIRKELKIKEGAENLRKVTTDKKSLAYVDNLIKKSNNKL-93  
94-EELHHKLQELNAHIVVSDPE**DITD**CPRTPDTPNNDPRCSTSNRLKALQKQLDIELKVKQG-154

B

PKN-1 32-QKLDFSDTMVQQKLD**DIKD**RIKREIRKELKIKEGAENLRKVTTDKKSLAYVDNLIKKSNNKL-93  
PKN-2 32-QKLDFSDTMVQQKLD**DIKD**RIKREIRKELKIKEGAENLRKVTTDKKSLAYVDNLIKKSNNKL-93  
PKN-3 65-GAENLRKVTTDKKSLAYVDNLIKKSNNKL-93

PKN-1 94-EELHHKLQELNAHIVVSDPE**DITD**CPRTPDTPNNDPRCSTSNRLKALQKQLDIELKVKQG-154  
PKN-2 94-EELHHKLQELNAHIVVSDPE**DITD**CPRTPDTPNNDPRCSTSNRLKA-140  
PKN-3 94-EELHHKLQELNAHIVVSDPE**DITD**CPRTPDTPNNDPRCSTSNRLKALQKQLDIELKVKQGAE-156
