# Supplementary material
Source: PubMed Central journal article supplement (PMC1964865)

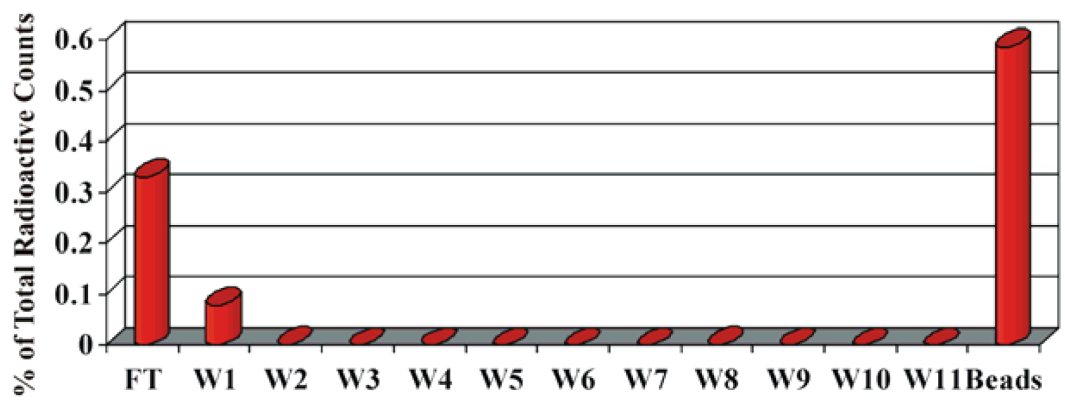

Supplement: pnas_0702251104_1.pdf [file pnas_0702251104_1.pdf]

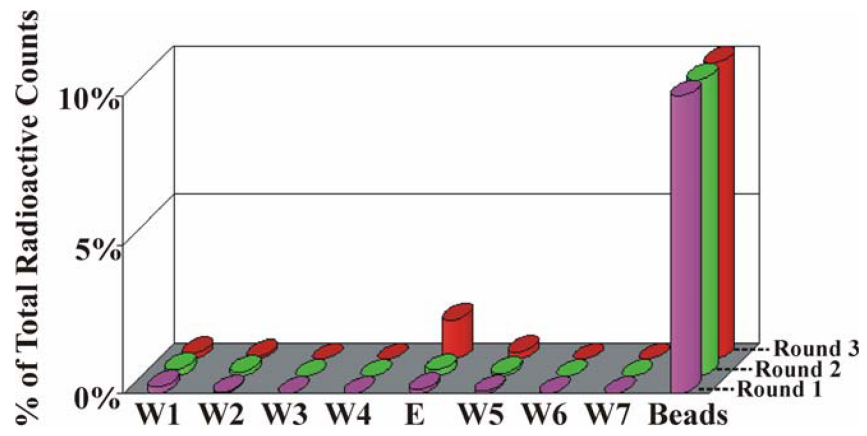

Supplement: pnas_0702251104_2.pdf [file pnas_0702251104_2.pdf]

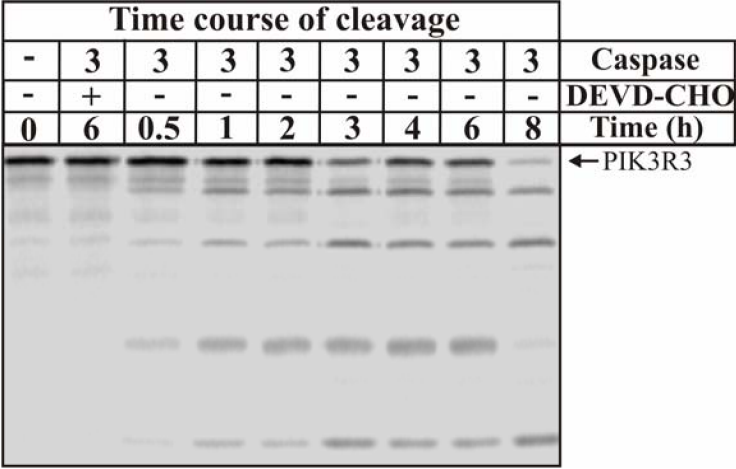

Supplement: pnas_0702251104_4.pdf [file pnas_0702251104_4.pdf]

### Apoptosis time course

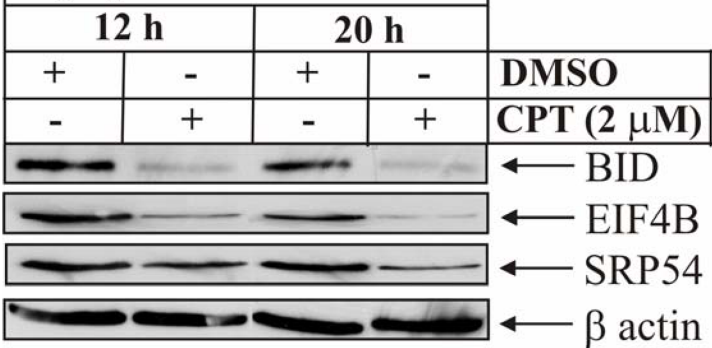

Supplement: pnas_0702251104_5.pdf [file pnas_0702251104_5.pdf]

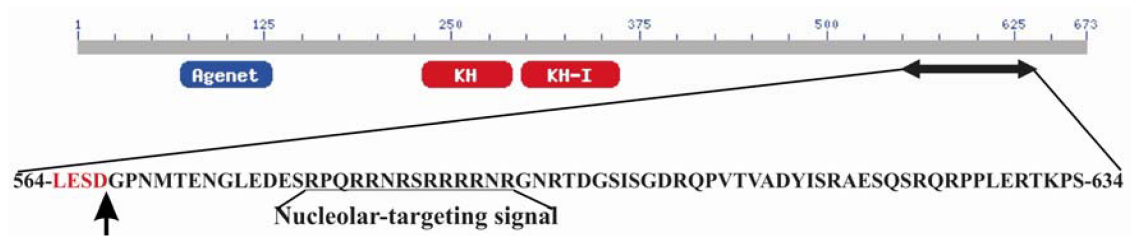

Supplement: pnas_0702251104_6.pdf [file pnas_0702251104_6.pdf]
